# Supplementary material for: Transcription factor and chromatin features predict genes associated with eQTLs
Source: PubMed Central journal article supplement — Nucleic Acids Res. 2012 Dec 25;41(3):1450–63. doi: 10.1093/nar/gks1339 (PMC3561974; doi:10.1093/nar/gks1339), 2012-12-25
Supplement: supp_gks1339_nar-01576-n-2012-File012.pdf [file supp_gks1339_nar-01576-n-2012-File012.pdf]

## Supplementary Figures and Table

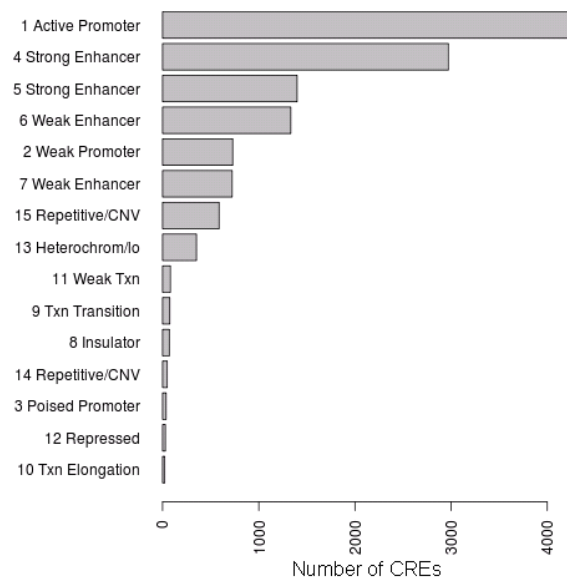

Figure 1: Frequency of each chromatin state at detected CREs. In comparison to the portion of the genome cover (<1% for promoter and enhancer states versus >70% for inactive state 13), promoter and enhancer states are enriched at CREs.

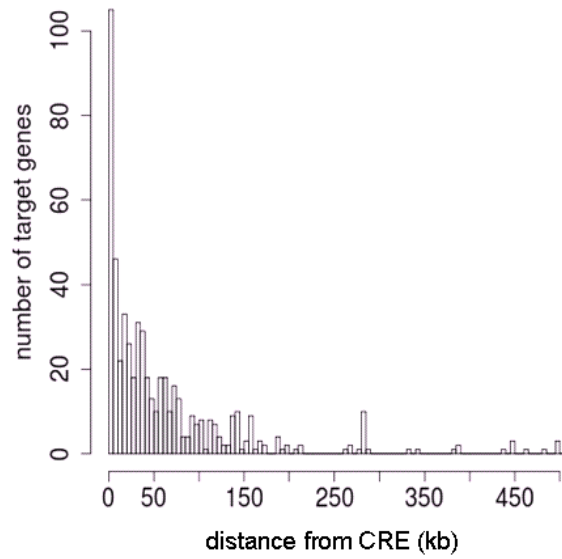

Figure 2: Distribution of target genes relative to distance from CREs. Target genes considered distal to a CRE were identified as being further than 150kb away.

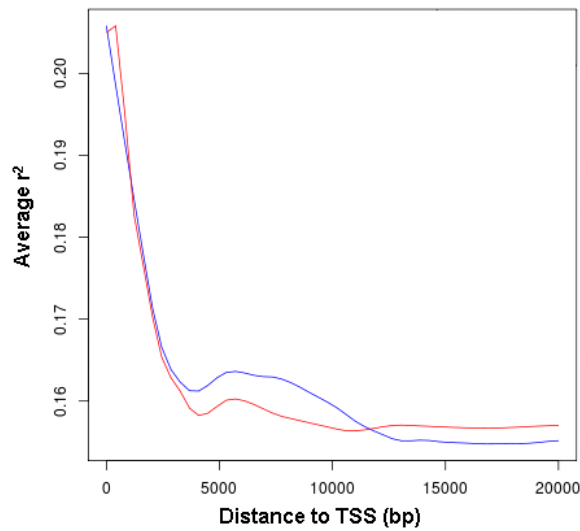

Figure 3: Assessment of gene expression prediction for different CRE positions relative to the TSS. The mean  $r^2$  between observed and predicted expression decreases as we consider CREs further away from the TSS (blue line). Accuracy of prediction also decreases if the CRE described in the model is the closest to the TSS (red line).

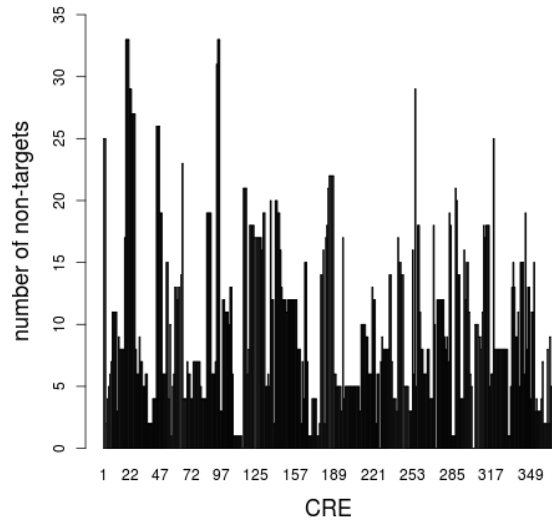

Figure 4: Distribution of non-target genes mapped to CREs. Genes 1Mb upstream and downstream of each CRE were analyzed. For training and testing of target gene prediction, genes not associated with any SNP in the CREs are classified as non-targets.

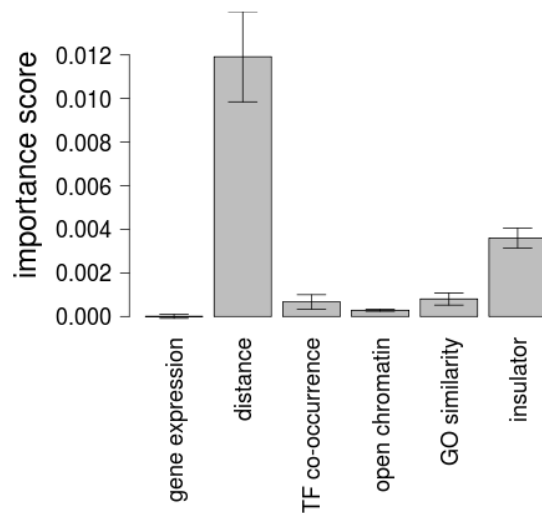

Figure 5: Conditional permutation importance scores of the six features used in the random forests classifier. Mean scores and standard errors from the different training sets used in cross validation are shown.

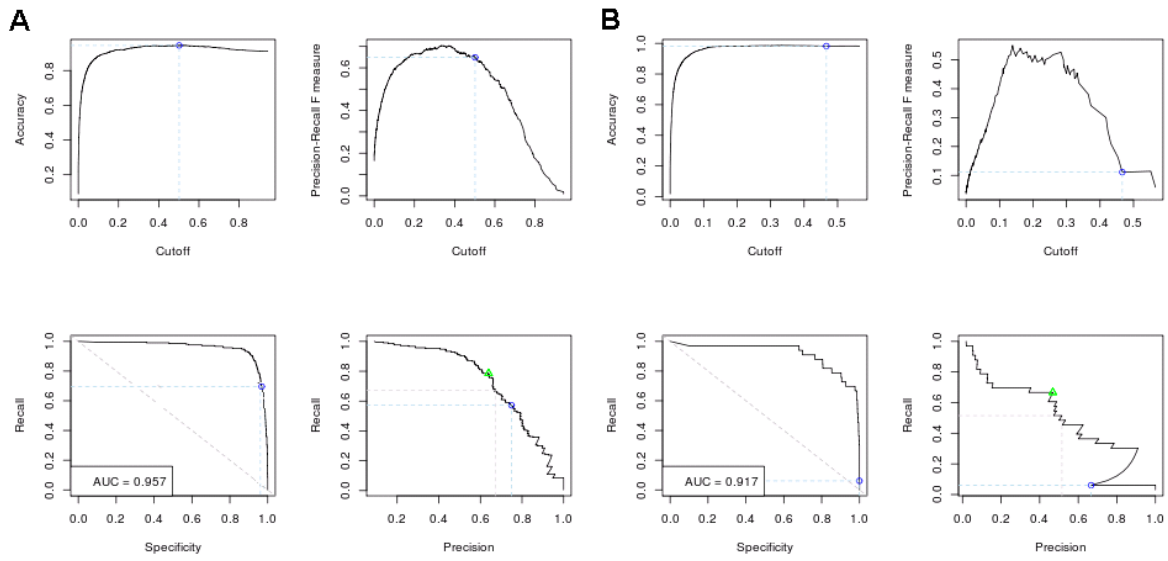

Figure 6: ROC curves for (A) classification of genes within 1Mb of CREs and (B) genes at least 150kb from CREs are compared to other measures of classifier performance. Dotted lines indicate the target probability cutoff  $\Theta = 0.5$ .

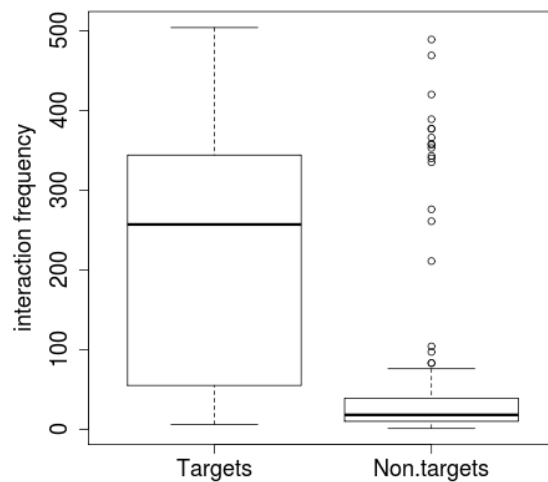

Figure 7: Comparison of intrachromosomal interactions detected by HiC between CREs and the two classes of genes. Genomic regions containing target genes have a higher frequency of being ligated (interaction frequency) to regions containing CREs.

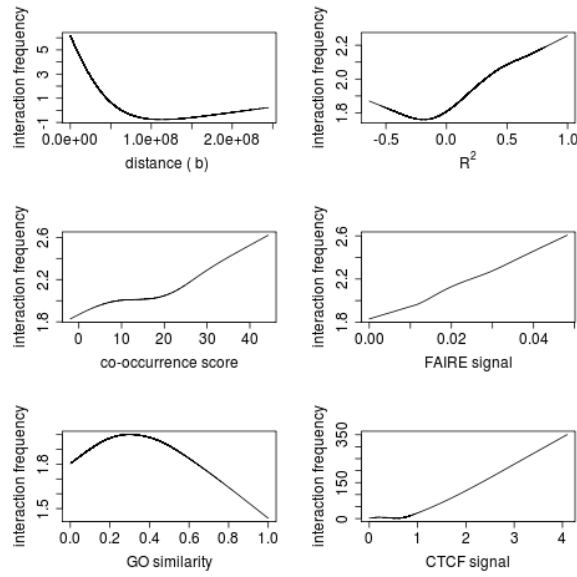

Figure 8: Features used in the classification of genes in relation to the chromosomal interactions between loci containing the CRE and gene. The average number of observed contacts estimated by ligation products (interaction frequency) between the locus containing the CRE and the locus containing the gene is compared to variations in genomic distance, gene co-expression ( $R^2$ ), TF co-occurrence (co-occurrence score), open chromatin (FAIRE signal), gene functional similarity (GO similarity), and insulators (CTCF signal).

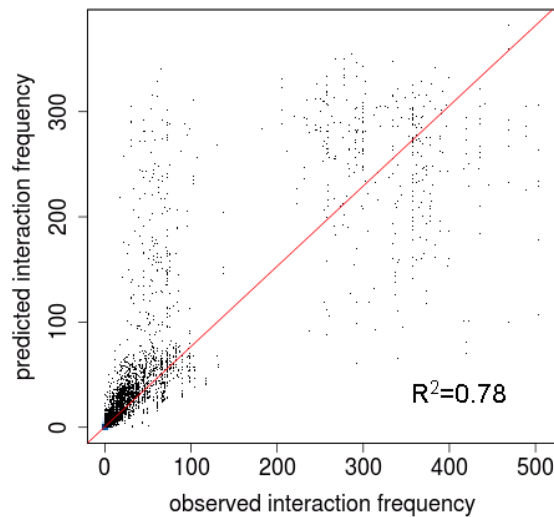

Figure 9: Predicted versus observed number of intrachromosomal interactions using the random forests classifier. We extracted features for each gene-CRE pair and predicted the interaction frequency of the gene's locus with the CRE's locus.

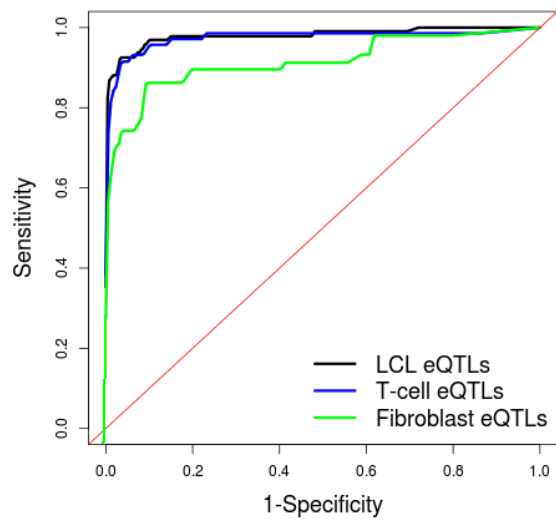

Figure 10: Comparison of ROC curves for predicting targets of eQTLs in LCLs (black), T-cells (blue), and fibroblasts (green). Each curve represents the average of ROC curves from 10-fold cross-validation on eQTL data from each cell type.

Table 1: Transcription factor ChIP-seq data downloaded from ENCODE

| <b>Source</b>            | <b>TFs</b> | <b>Number of binding sites</b> |
|--------------------------|------------|--------------------------------|
| Hudson Alpha             | ATF3       | 2028                           |
| Hudson Alpha             | BCL11A     | 25330                          |
| Hudson Alpha             | BCL3       | 22503                          |
| Hudson Alpha             | EGR1       | 487                            |
| Hudson Alpha             | ELF1       | 17931                          |
| Hudson Alpha             | ETS1       | 7544                           |
| Yale/UC-Davis/Harvard    | FOS        | 3284                           |
| Hudson Alpha             | GABP       | 2384                           |
| Hudson Alpha             | IRF4       | 22281                          |
| Yale/UC-Davis/Harvard    | JUN        | 82655                          |
| Yale/UC-Davis/Harvard    | JUND       | 12958                          |
| Yale/UC-Davis/Harvard    | MAX        | 6546                           |
| Hudson Alpha             | MEF2A      | 18000                          |
| Yale/UC-Davis/Harvard    | MYC        | 57629                          |
| Yale/UC-Davis/Harvard    | NFKB       | 53740                          |
| Hudson Alpha             | NRSF       | 2142                           |
| Hudson Alpha             | PBX3       | 17435                          |
| Hudson Alpha             | PU1        | 44755                          |
| Yale/UC-Davis/Harvard    | RAD21      | 42564                          |
| Hudson Alpha             | RXRA       | 5398                           |
| Hudson Alpha             | SP1        | 26121                          |
| Hudson Alpha             | SRF        | 658                            |
| Hudson Alpha             | TAF1       | 4666                           |
| Hudson Alpha             | TCF12      | 20356                          |
| Yale/UC-Davis/Harvard    | TR4        | 10617                          |
| Yale/UC-Davis/Harvard    | YY1        | 3437                           |
| Hudson Alpha             | ZBTB33     | 2282                           |
| Hudson Alpha             | ZEB1       | 4067                           |
| Yale/UC-Davis/Harvard    | ZZZ3       | 8439                           |
| University of Washington | CTCF       | 69461                          |

Table 2: CRE-target interactions in CD4+ T cells detected by ChIA-PET. Interaction between loci containing the CRE and target gene is measured by the number of paired-end reads mapped to the loci.

| <b>SNP</b> | <b>element chr</b> | <b>CRE start</b> | <b>CRE end</b> | <b>target gene</b> | <b>mapped tags</b> |
|------------|--------------------|------------------|----------------|--------------------|--------------------|
| rs817353   | chr20              | 62081649         | 62083030       | NCRNA00176         | 8                  |
| rs817349   | chr20              | 62080193         | 62080756       | NCRNA00176         | 8                  |
| rs11680096 | chr2               | 27127112         | 27127937       | KHK                | 8                  |
| rs11126836 | chr2               | 27126608         | 27126608       | KHK                | 8                  |
| rs41417151 | chr1               | 231126318        | 231126413      | NTPCR              | 6                  |
| rs3812472  | chr8               | 125555838        | 125556299      | TRMT12             | 8                  |
| rs11778396 | chr8               | 125556942        | 125556942      | TRMT12             | 8                  |
| rs3740286  | chr10              | 90740996         | 90741708       | ACTA2              | 4                  |
| rs12359362 | chr10              | 90742786         | 90743184.5     | ACTA2              | 4                  |
| rs6480616  | chr10              | 73727066         | 73728373       | DDIT4              | 6                  |
